# Supplementary material
Source: PubMed Central journal article supplement (PMC4704190)
Supplement: AAC.02140-15_zac001164771so1.pdf [file AAC.02140-15_zac001164771so1.pdf]

**Table S1.** PCR primers, conditions and control strains used in this study

| Gene         | Primer <sup>a</sup> | Sequence (5'-3')                 | Annealing temperature (°C) | Size (bp) | Reference strain      | Reference |
|--------------|---------------------|----------------------------------|----------------------------|-----------|-----------------------|-----------|
| <i>qacAB</i> | qacAB_F             | ATGCCTTATATTTATTTAATAATAGCC      | 42                         | 321       | ATCC BAA-44 (HPV107)  | (1)       |
|              | qacAB_R             | ATGCGATGTTCGAAAAATGTTTAAAC       |                            |           |                       |           |
| <i>smr</i>   | smr_F               | ATAAGTACTGAAGTTATTGGAAGT         | 48                         | 285       | <i>S. aureus</i> SM52 | (2, 3)    |
|              | smr-R               | TTCCGAAAAATGTTTAAACGAAACTA       |                            |           |                       |           |
| <i>norA</i>  | norA_F              | TTCACCAAGCCATCAAAAAAG            | 45                         | 620       | <i>S. aureus</i> COL  | (2, 4)    |
|              | norA_R              | CTTGCCTTTCTCCAGCAATA             |                            |           |                       |           |
| <i>lmrS</i>  | lmrS_F              | GCAAGCTTATGGCTAAAAGTTGAATTAACAAC | 53                         | 1441      | <i>S. aureus</i> COL  | (5)       |
|              | lmrS_R              | GCGGATCCTTAAAAATTTCTTCTATTACTTT  |                            |           |                       |           |
| <i>mepA</i>  | mepA_F              | ATGTTGCTGCTGCTCTGTTC             | 53                         | 718       | <i>S. aureus</i> COL  | (2)       |
|              | mepA_R              | TCAACTGTCAAACGATCAGC             |                            |           |                       |           |
| <i>sepA</i>  | sepA_F              | GCAGTCGAGCATTTAATGGA             | 53                         | 103       | ATCC51811             | (2)       |
|              | sepA_R              | ACGTTGTTGCAACTGTGTAAGA           |                            |           |                       |           |

<sup>a</sup> F-forward primer; R-reverse primer

## References

1. **Noguchi N, Hase M, Kitta M, Sasatsu M, Deguchi K, Kono M.** 1999. Antiseptic susceptibility and distribution of antiseptic-resistance genes in methicillin-resistant *Staphylococcus aureus*. FEMS Microbiol Lett **172**:247-253.
2. **Couto I, Costa SS, Viveiros M, Martins M, Amaral L.** 2008. Efflux-mediated response of *Staphylococcus aureus* exposed to ethidium bromide. J Antimicrob Chemother **62**:504-513.
3. **Costa SS, Mourato C, Viveiros M, Melo-Cristino J, Amaral L, Couto I.** 2013. Description of plasmid pSM52, harbouring the gene for the Smr efflux pump, and its involvement in resistance to biocides in a methicillin-resistant *Staphylococcus aureus* strain. Int J Antimicrob Agents **41**:490-492.
4. **Sierra JM, Ruiz J, Jimenez De Anta MT, Vila J.** 2000. Prevalence of two different genes encoding NorA in 23 clinical strains of *Staphylococcus aureus*. J Antimicrob Chemother **46**:145-146.
5. **Floyd JL, Smith KP, Kumar SH, Floyd JT, Varela MF.** 2010. LmrS is a multidrug efflux pump of the major facilitator superfamily from *Staphylococcus aureus*. Antimicrob Agents Chemother **54**:5406-5412.

**Table S2.** Prevalence of six biocide resistance genes among 301 *S. aureus* isolates recovered in Angola, Cape Verde and São Tomé and Príncipe (STP).

|            | <i>qacAB</i> no. (%) |            |                   | <i>smr</i> no. (%) |            |         | <i>norA</i> no. (%) |           |               | <i>lmrS</i> no. (%) |           |                   | <i>mepA</i> no. (%) |           |                   | <i>sepA</i> no. (%) |          |               |
|------------|----------------------|------------|-------------------|--------------------|------------|---------|---------------------|-----------|---------------|---------------------|-----------|-------------------|---------------------|-----------|-------------------|---------------------|----------|---------------|
|            | positive             | negative   | p-value           | positive           | negative   | p-value | positive            | negative  | p-value       | positive            | negative  | p-value           | positive            | negative  | p-value           | positive            | negative | p-value       |
| MRSA       | 54 (65.9)            | 28 (34.1)  | <b>&lt;0.0001</b> | 5 (6.1)            | 77 (93.9)  | 0.0779  | 72 (87.8)           | 10 (12.2) | 0.7106        | 53 (64.6)           | 29 (35.4) | 0.4289            | 71 (86.6)           | 11 (13.4) | 0.4005            | 82 (100)            | 0 (0.0)  | <b>0.0137</b> |
| MSSA       | 68 (31.1)            | 151 (68.9) |                   | 6 (2.7)            | 213 (97.3) |         | 188 (85.8)          | 31 (14.2) |               | 130 (59.4)          | 89 (40.6) |                   | 198 (90.4)          | 21 (9.6)  |                   | 205 (93.6)          | 14 (6.4) |               |
| Total      | 122                  | 179        |                   | 11                 | 290        |         | 260                 | 41        |               | 183                 | 118       |                   | 269                 | 32        |                   | 287                 | 14       |               |
| Angola     | 67 (56.3)            | 52 (43.7)  | <b>&lt;0.0001</b> | 7 (5.9)            | 112 (94.1) | 0.1198  | 97 (81.5)           | 22 (18.5) | 0.0583        | 59 (49.6)           | 60 (50.4) | <b>0.0017</b>     | 92 (77.3)           | 27 (22.7) | <b>&lt;0.0001</b> | 110 (92.4)          | 9 (7.6)  | 0.0893        |
| Cape Verde | 30 (28.6)            | 75 (71.4)  | <b>0.0021</b>     | 4 (3.8)            | 101 (96.2) | 1       | 88 (83.8)           | 17 (16.2) | 0.3794        | 57 (54.3)           | 48 (45.7) | 0.1074            | 101 (96.2)          | 4 (3.8)   | <b>0.0053</b>     | 103 (98.1)          | 2 (1.9)  | 0.1495        |
| STP        | 25 (32.5)            | 52 (67.5)  | 0.1072            | 0 (0.0)            | 77 (100)   | 0.0717  | 75 (97.4)           | 2 (2.6)   | <b>0.0004</b> | 67 (87.0)           | 10 (13)   | <b>&lt;0.0001</b> | 76 (98.7)           | 1 (1.3)   | <b>0.001</b>      | 74 (96.1)           | 3 (3.9)  | 1             |

p-values in bold indicate statistically significance at p <0.05.

**Table S3.** Relation between the six biocide resistance genes carriage and antimicrobial resistance among *S. aureus* isolates

| Antibiotic       |           | <i>qacAB</i> |              |                    |                   | <i>smr</i>   |              |               |                   | <i>norA</i>  |              |               |                   |
|------------------|-----------|--------------|--------------|--------------------|-------------------|--------------|--------------|---------------|-------------------|--------------|--------------|---------------|-------------------|
|                  |           | positive (%) | negative (%) | p-value            | OR (95% CI)       | positive (%) | negative (%) | p-value       | OR (95% CI)       | positive (%) | negative (%) | p-value       | OR (95% CI)       |
| Cefoxitin        | R (n=82)  | 54 (65.9)    | 28 (34.1)    | <b>&lt; 0.0001</b> | 4.43 (2.55-7.70)  | 5 (6.1)      | 77 (93.9)    | 0.3177        | 1.97 (0.58-6.65)  | 72 (87.8)    | 10 (12.2)    | 1             | 1.10 (0.50-2.41)  |
|                  | S (n=188) | 57 (30.3)    | 131 (69.7)   |                    |                   | 6 (3.2)      | 182 (96.8)   |               |                   | 163 (86.7)   | 25 (13.3)    |               |                   |
| Penicillin       | R (n=261) | 108 (41.4)   | 153 (58.6)   | 0.7408             | 1.41 (0.35-5.77)  | 11 (4.2)     | 250 (95.8)   | 1             | 0.87 (0.05-15.94) | 228 (87.4)   | 33 (12.6)    | 0.3294        | 1.97 (0.39-9.91)  |
|                  | S (n=9)   | 3 (33.3)     | 6 (66.7)     |                    |                   | 0 (0)        | 9 (100)      |               |                   | 7 (77.8)     | 2 (22.2)     |               |                   |
| Ciprofloxacin    | R (n=28)  | 13 (46.4)    | 15 (53.6)    | 0.5499             | 1.27 (0.58-2.79)  | 3 (10.7)     | 25 (89.3)    | 0.0935        | 3.51 (0.87-14.09) | 23 (82.1)    | 5 (17.9)     | 0.3814        | 0.65 (0.23-1.84)  |
|                  | S (n=242) | 98 (40.5)    | 144 (59.5)   |                    |                   | 8 (3.3)      | 234 (96.7)   |               |                   | 212 (87.6)   | 30 (12.4)    |               |                   |
| Gentamicin       | R (n=30)  | 21 (70.0)    | 9 (30.0)     | <b>0.0013</b>      | 3.89 (1.71-8.86)  | 4 (13.3)     | 26 (86.7)    | <b>0.0236</b> | 5.12 (1.40-18.68) | 26 (86.7)    | 4 (13.3)     | 1             | 0.96 (0.32-2.95)  |
|                  | S (n=240) | 90 (37.5)    | 150 (62.5)   |                    |                   | 7 (2.9)      | 233 (97.1)   |               |                   | 209 (87.1)   | 31 (12.9)    |               |                   |
| Clindamycin      | R (n=15)  | 9 (60.0)     | 6 (40.0)     | 0.1762             | 2.25 (0.78-6.52)  | 1 (6.7)      | 14 (93.3)    | 0.4733        | 1.75 (0.21-14.66) | 14 (93.3)    | 1 (6.7)      | 0.7012        | 2.15 (0.27-16.92) |
|                  | S (n=255) | 102 (40.0)   | 153 (60.0)   |                    |                   | 10 (3.9)     | 245 (96.1)   |               |                   | 221 (86.7)   | 34 (13.3)    |               |                   |
| Erythromycin     | R (n=56)  | 27 (48.2)    | 29 (51.8)    | 0.2274             | 1.44 (0.80-2.60)  | 3 (5.4)      | 53 (94.6)    | 0.7027        | 1.46 (0.37-5.69)  | 48 (85.7)    | 8 (14.3)     | 0.8231        | 0.87 (0.37-2.03)  |
|                  | S (n=214) | 84 (39.3)    | 130 (60.7)   |                    |                   | 8 (3.7)      | 206 (96.3)   |               |                   | 187 (87.4)   | 27 (12.6)    |               |                   |
| Tetracycline     | R (n=50)  | 27 (54.0)    | 23 (46.0)    | 0.0553             | 1.90 (1.02-3.53)  | 3 (6)        | 47 (94)      | 0.4328        | 1.69 (0.43-6.62)  | 38 (76)      | 12 (24)      | <b>0.0176</b> | 0.37 (0.17-0.81)  |
|                  | S (n=220) | 84 (38.2)    | 136 (61.8)   |                    |                   | 8 (3.6)      | 212 (96.4)   |               |                   | 197 (89.5)   | 23 (10.5)    |               |                   |
| Rifampicin       | R (n=94)  | 54 (57.4)    | 40 (42.6)    | <b>&lt; 0.0001</b> | 2.82 (1.68-4.72)  | 2 (2.1)      | 92 (97.9)    | 0.3390        | 0.40 (0.09-1.91)  | 76 (80.9)    | 18 (19.1)    | <b>0.0358</b> | 0.45 (0.22-0.92)  |
|                  | S (n=176) | 57 (32.4)    | 119 (67.6)   |                    |                   | 9 (5.1)      | 167 (94.9)   |               |                   | 159 (90.3)   | 17 (9.7)     |               |                   |
| SXT <sup>a</sup> | R (n=106) | 67 (63.2)    | 39 (36.8)    | <b>&lt; 0.0001</b> | 4.69 (2.77-7.92)  | 3 (2.8)      | 103 (97.2)   | 0.5358        | 0.57 (0.15-2.19)  | 95 (89.6)    | 11 (10.4)    | 0.3570        | 1.48 (0.69-3.16)  |
|                  | S (n=164) | 44 (26.8)    | 120 (73.2)   |                    |                   | 8 (4.9)      | 156 (95.1)   |               |                   | 140 (85.4)   | 24 (14.6)    |               |                   |
| Fusidic acid     | R (n=7)   | 5 (71.4)     | 2 (28.6)     | 0.1277             | 3.70 (0.71-19.45) | 0 (0)        | 7 (100)      | 1             | 1.46 (0.08-27.24) | 7 (100)      | 0 (0)        | 0.5999        | 2.33 (0.13-41.73) |
|                  | S (n=263) | 106 (40.3)   | 157 (59.7)   |                    |                   | 11 (4.2)     | 252 (95.8)   |               |                   | 228 (86.7)   | 35 (13.3)    |               |                   |
| Cloramphenicol   | R (n=14)  | 10 (71.4)    | 4 (28.6)     | <b>0.0244</b>      | 3.84 (1.17-12.57) | 0 (0)        | 14 (100)     | 1             | 0.74 (0.04-13.13) | 11 (78.6)    | 3 (21.4)     | 0.4027        | 0.52 (0.14-1.98)  |
|                  | S (n=256) | 101 (39.5)   | 155 (60.5)   |                    |                   | 11 (4.3)     | 245 (95.7)   |               |                   | 224 (87.5)   | 32 (12.5)    |               |                   |

**Table S3. (cont.)**

| Antibiotic       |           | <i>lmrS</i>  |              |                    |                   | <i>mepA</i>  |              |               |                   | <i>sepA</i>  |              |               |                    |
|------------------|-----------|--------------|--------------|--------------------|-------------------|--------------|--------------|---------------|-------------------|--------------|--------------|---------------|--------------------|
|                  |           | positive (%) | negative (%) | p-value            | OR (95% CI)       | positive (%) | negative (%) | p-value       | OR (95% CI)       | positive (%) | negative (%) | p-value       | OR (95% CI)        |
| Cefoxitin        | R (n=82)  | 53 (64.6)    | 29 (35.4)    | 0.7844             | 1.11 (0.65-1.90)  | 71(86.6)     | 11 (13.4)    | 0.6826        | 0.81 (0.37-1.77)  | 82 (100)     | 0 (0)        | 0.0115        | 12.69 (0.74-216.3) |
|                  | S (n=188) | 117 (62.2)   | 71 (37.8)    |                    |                   | 167 (88.8)   | 21 (11.2)    |               |                   | 175 (93.1)   | 13 (6.9)     |               |                    |
| Penicillin       | R (n=261) | 163 (62.5)   | 98 (37.5)    | 0.4919             | 0.48 (0.10-2.33)  | 230 (88.1)   | 31 (11.9)    | 1             | 0.93 (0.11-7.67)  | 248 (95)     | 13 (5)       | 1             | 0.97 (0.05-17.55)  |
|                  | S (n=9)   | 7 (77.8)     | 2 (22.2)     |                    |                   | 8 (88.9)     | 1 (11.1)     |               |                   | 9 (100)      | 0 (0)        |               |                    |
| Ciprofloxacin    | R (n=28)  | 18 (64.3)    | 10 (35.7)    | 1                  | 1.07 (0.47-2.41)  | 24 (85.7)    | 4 (14.3)     | 0.7558        | 0.79 (0.25-2.42)  | 27 (96.4)    | 1 (3.6)      | 1             | 1.41 (0.18-11.27)  |
|                  | S (n=242) | 152 (62.8)   | 90 (37.2)    |                    |                   | 214 (88.4)   | 28 (11.6)    |               |                   | 230 (95)     | 12 (5)       |               |                    |
| Gentamicin       | R (n=30)  | 20 (66.7)    | 10 (33.3)    | 0.6943             | 1.20 (0.54-2.68)  | 25 (83.3)    | 5 (16.7)     | 0.3727        | 0.63 (0.22-1.79)  | 29 (96.7)    | 1 (3.3)      | 1             | 1.53 (0.19-12.18)  |
|                  | S (n=240) | 150 (62.5)   | 90 (37.5)    |                    |                   | 213 (88.8)   | 27 (11.3)    |               |                   | 228 (95)     | 12 (5)       |               |                    |
| Clindamycin      | R (n=15)  | 10 (66.7)    | 5 (33.3)     | 1                  | 1.19 (0.40-3.58)  | 14 (93.3)    | 1 (6.7)      | 1             | 1.94 (0.25-15.26) | 15 (100)     | 0 (0)        | 1             | 1.73 (0.10-30.43)  |
|                  | S (n=255) | 160 (62.7)   | 95 (37.3)    |                    |                   | 224 (87.8)   | 31 (12.2)    |               |                   | 242 (94.9)   | 13 (5.1)     |               |                    |
| Erythromycin     | R (n=56)  | 32 (57.1)    | 24 (42.9)    | 0.3519             | 0.73 (0.40-1.34)  | 45 (80.4)    | 11 (19.6)    | 0.0607        | 0.45 (0.20-0.99)  | 56 (100)     | 0 (0)        | 0.0769        | 7.57 (0.44-129.4)  |
|                  | S (n=214) | 138 (64.5)   | 76 (35.5)    |                    |                   | 193 (90.2)   | 21 (9.8)     |               |                   | 201 (93.9)   | 13 (6.1)     |               |                    |
| Tetracycline     | R (n=50)  | 29 (58)      | 21 (42)      | 0.4224             | 0.78 (0.42-1.45)  | 37 (74)      | 13 (26)      | <b>0.0024</b> | 0.27 (0.12-0.59)  | 48 (96)      | 2 (4)        | 1             | 1.26 (0.27-5.89)   |
|                  | S (n=220) | 141 (64.1)   | 79 (35.9)    |                    |                   | 201 (91.4)   | 19 (8.6)     |               |                   | 209 (95)     | 11 (5)       |               |                    |
| Rifampicin       | R (n=94)  | 43 (45.7)    | 51 (54.3)    | <b>&lt; 0.0001</b> | 0.33 (0.19-0.55)  | 74 (78.7)    | 20 (21.3)    | <b>0.0007</b> | 0.27 (0.13-0.58)  | 89 (94.7)    | 5 (5.3)      | 0.7721        | 0.85 (0.27-2.67)   |
|                  | S (n=176) | 127 (72.2)   | 49 (27.8)    |                    |                   | 164 (93.2)   | 12 (6.8)     |               |                   | 168 (95.5)   | 8 (4.5)      |               |                    |
| SXT <sup>a</sup> | R (n=106) | 68 (64.2)    | 38 (35.8)    | 0.7969             | 1.09 (0.65-1.81)  | 90 (84.9)    | 16 (15.1)    | 0.2469        | 0.61 (0.29-1.28)  | 106 (100)    | 0 (0)        | <b>0.0021</b> | 18.98 (1.11-323.0) |
|                  | S (n=164) | 102 (62.2)   | 62 (37.8)    |                    |                   | 148 (90.2)   | 16 (9.8)     |               |                   | 151 (92.1)   | 13 (7.9)     |               |                    |
| Fusidic acid     | R (n=7)   | 6 (85.7)     | 1 (14.3)     | 0.2650             | 3.62 (0.43-30.54) | 7 (100)      | 0 (0)        | 1             | 2.11 (0.12-37.77) | 7 (100)      | 0 (0)        | 1             | 0.81 (0.04-14.92)  |
|                  | S (n=263) | 164 (62.4)   | 99 (37.6)    |                    |                   | 231 (87.8)   | 32 (12.2)    |               |                   | 250 (95.1)   | 13 (4.9)     |               |                    |
| Cloramphenicol   | R (n=14)  | 8(57.1)      | 6 (42.9)     | 0.7773             | 0.77 (0.26-2.30)  | 10 (71.4)    | 4 (28.6)     | 0.0693        | 0.31 (0.09-1.04)  | 14 (100)     | 0 (0)        | 1             | 1.61 (0.09-28.43)  |
|                  | S (n=256) | 162 (63.3)   | 94 (36.7)    |                    |                   | 228 (89.1)   | 28 (10.9)    |               |                   | 243 (94.9)   | 13 (5.1)     |               |                    |

Total number of isolates included: 270. There was no data regarding Cape Verde isolates from 1997, which were excluded from the analysis. p-values in bold indicate statistical significance at  $p < 0.05$  and OR 95% CI does not include 1.

<sup>a</sup> SXT - Trimethoprim-sulfamethoxazole
